# Supplementary material for: Structure–activity correlation in aerobic cyclohexene oxidation and peroxide decomposition over CoxFe3−xO4 spinel oxides
Source: Royal Society of Chemistry journal article supplement (doi:10.1039/d2cy00505k), 2022-01-01
Supplement: d2cy00505k1.pdf [file d2cy00505k1.pdf]

## Supporting Information

### Structure-activity correlation in aerobic cyclohexene oxidation and peroxide decomposition over $\text{Co}_x\text{Fe}_{3-x}\text{O}_4$ spinel oxides

Julia Bükler,<sup>[a]</sup> Steven Angel,<sup>[b]</sup> Soma Salamon,<sup>[c]</sup> Joachim Landers,<sup>[c]</sup> Tobias Falk,<sup>[a]</sup> Heiko Wende,<sup>[c]</sup> Hartmut Wiggers,<sup>\*[b]</sup> Christof Schulz,<sup>[b]</sup> Martin Muhler,<sup>[a],[c]</sup> and Baoxiang Peng<sup>\*[a],[c]</sup>

<sup>a</sup> Laboratory of Industrial Chemistry, Ruhr University Bochum, 44780 Bochum, Germany

<sup>b</sup> IVG, Institute for Combustion and Gas Dynamics – Reactive Fluids and CENIDE Center for Nanointegration, University of Duisburg-Essen, 47057 Duisburg, Germany

<sup>c</sup> Faculty of Physics, University of Duisburg-Essen, 47048 Duisburg, Germany

<sup>d</sup> Max Planck Institute for Chemical Energy Conversion, 45470 Mülheim an der Ruhr, Germany

E-mail: [hartmut.wiggers@uni-due.de](mailto:hartmut.wiggers@uni-due.de) (H. Wiggers);

[baoxiang.peng@techem.rub.de](mailto:baoxiang.peng@techem.rub.de) (B. Peng)

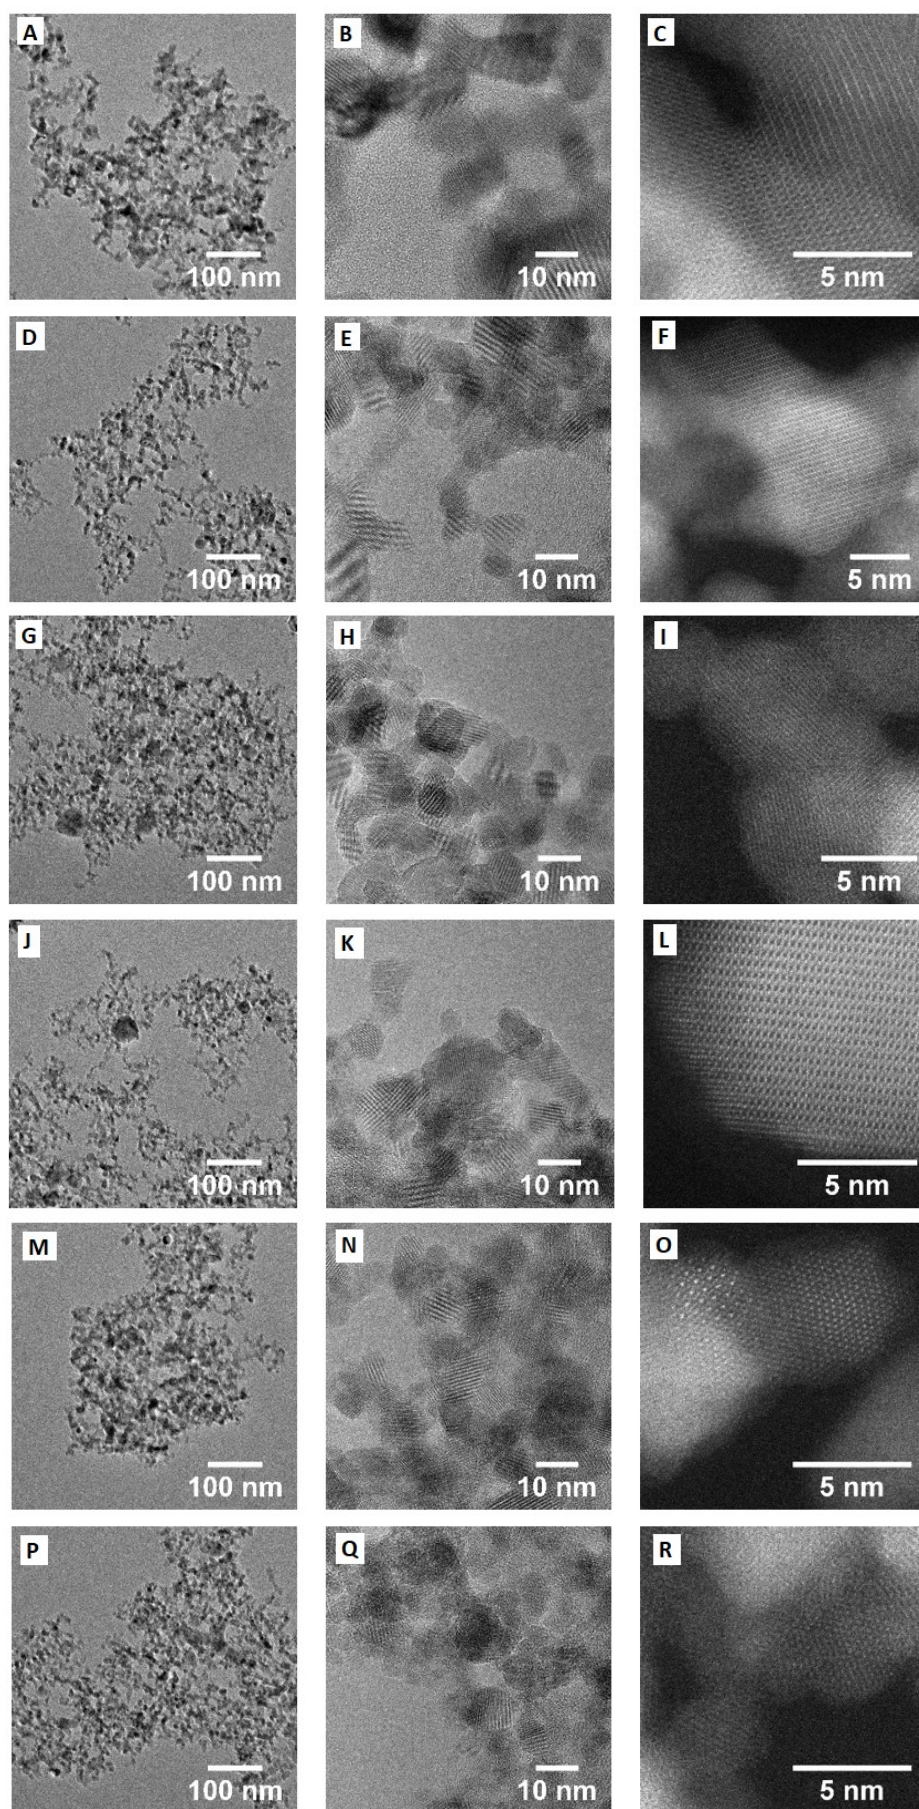

**Figure S1.** TEM and HAADF-STEM images of the  $\text{Co}_x\text{Fe}_{3-x}\text{O}_4$  ( $x=0, 0.5, 1, 1.5, 2, 2.5, 3$ ) samples:  $\text{Co}_3\text{O}_4$  (A-C),  $\text{Co}_{2.5}\text{Fe}_{0.5}\text{O}_4$  (D-F),  $\text{Co}_2\text{FeO}_4$  (G-I),  $\text{Co}_{1.5}\text{Fe}_{1.5}\text{O}_4$  (J-L),  $\text{Co}_{0.5}\text{Fe}_{2.5}\text{O}_4$  (M-O),  $\gamma\text{-Fe}_2\text{O}_3$  (P-R).

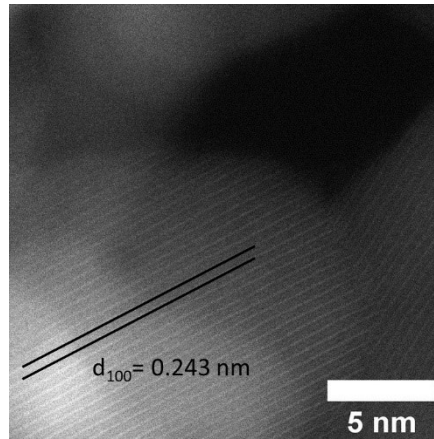

**Figure S2.** Determination of the lattice spacing in a  $\text{Co}_3\text{O}_4$  particle.

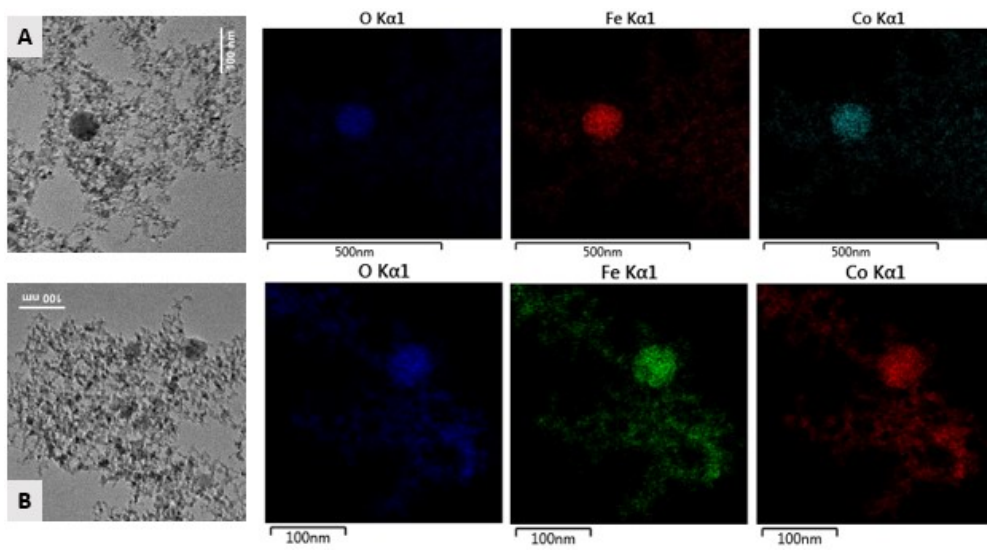

**Figure S3.** EDX mapping of  $\text{Co}_2\text{FeO}_4$  (A) and  $\text{CoFe}_2\text{O}_4$  (B).

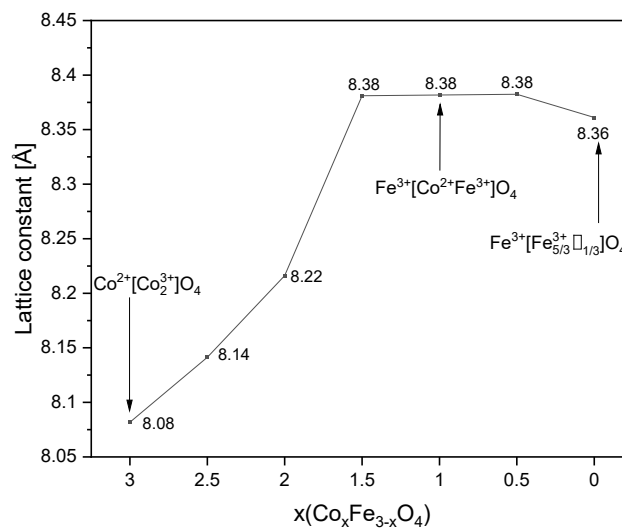

**Figure S4.** Lattice parameters of the  $\text{Co}_x\text{Fe}_{3-x}\text{O}_4$  ( $x=0, 0.5, 1, 1.5, 2, 2.5, 3$ ) samples determined by Rietveld refinement.

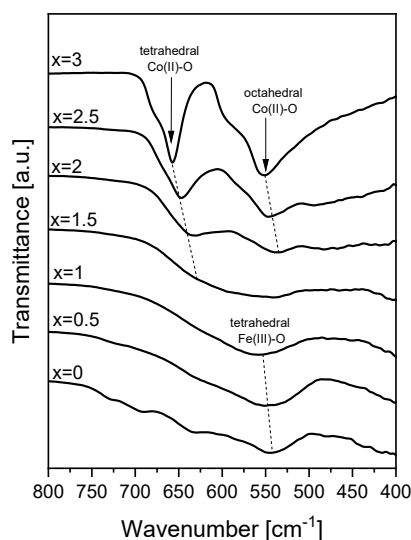

**Figure S5.** FT IR spectra of the  $\text{Co}_x\text{Fe}_{3-x}\text{O}_4$  ( $x=0, 0.5, 1, 1.5, 2, 2.5, 3$ ) samples.

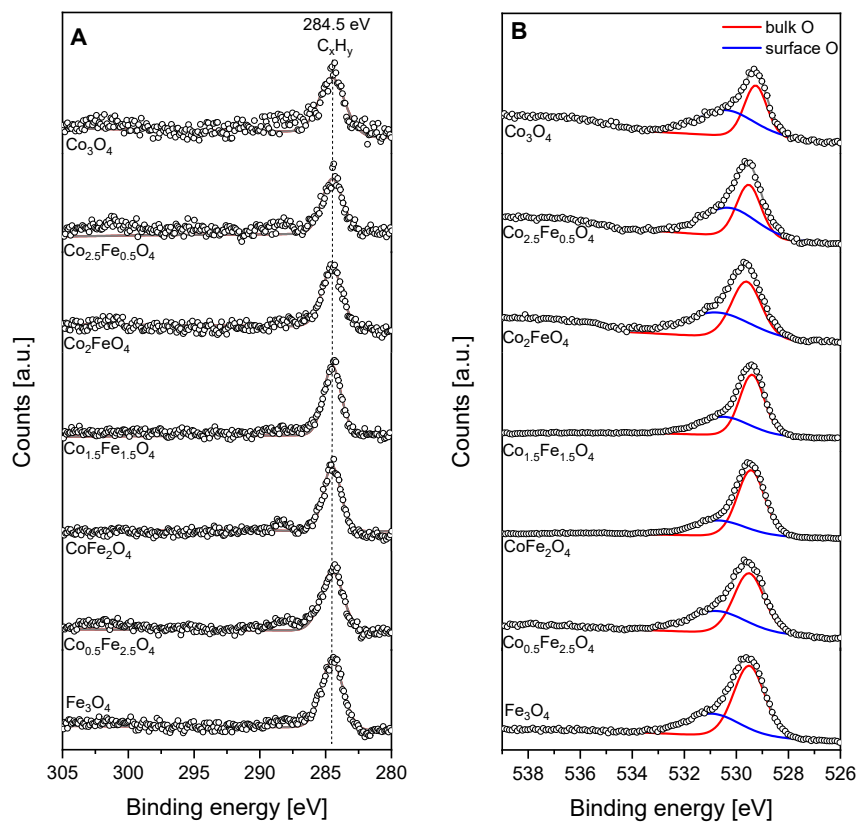

**Figure S6.** XP spectra of the C 1s (A) and O 1s (B) region of the  $\text{Co}_x\text{Fe}_{3-x}\text{O}_4$  ( $x=0, 0.5, 1, 1.5, 2, 2.5, 3$ ) samples.

**Table S1.** Surface composition of the  $\text{Co}_x\text{Fe}_{3-x}\text{O}_4$  ( $x=0, 0.5, 1, 1.5, 2, 2.5, 3$ ) samples derived from XP spectra.

| Sample                                     | C<br>[at. %] | O<br>[at. %] | Fe<br>[at. %] | Co<br>[at. %] |
|--------------------------------------------|--------------|--------------|---------------|---------------|
| $\text{Co}_3\text{O}_4$                    | 26.6         | 54.5         | 0             | 18.9          |
| $\text{Co}_{2.5}\text{Fe}_{0.5}\text{O}_4$ | 22.6         | 56.6         | 3.4           | 17.4          |
| $\text{Co}_2\text{FeO}_4$                  | 27.6         | 54.9         | 5.6           | 11.9          |
| $\text{Co}_{1.5}\text{Fe}_{1.5}\text{O}_4$ | 17.4         | 54.5         | 13.2          | 14.2          |
| $\text{CoFe}_{2.5}\text{O}_4$              | 18.2         | 56.8         | 16.1          | 9.0           |
| $\text{Co}_{0.5}\text{Fe}_{2.5}\text{O}_4$ | 30.3         | 54.7         | 12.2          | 2.8           |
| $\gamma\text{-Fe}_2\text{O}_3$             | 33.1         | 52.5         | 14.5          | 0             |



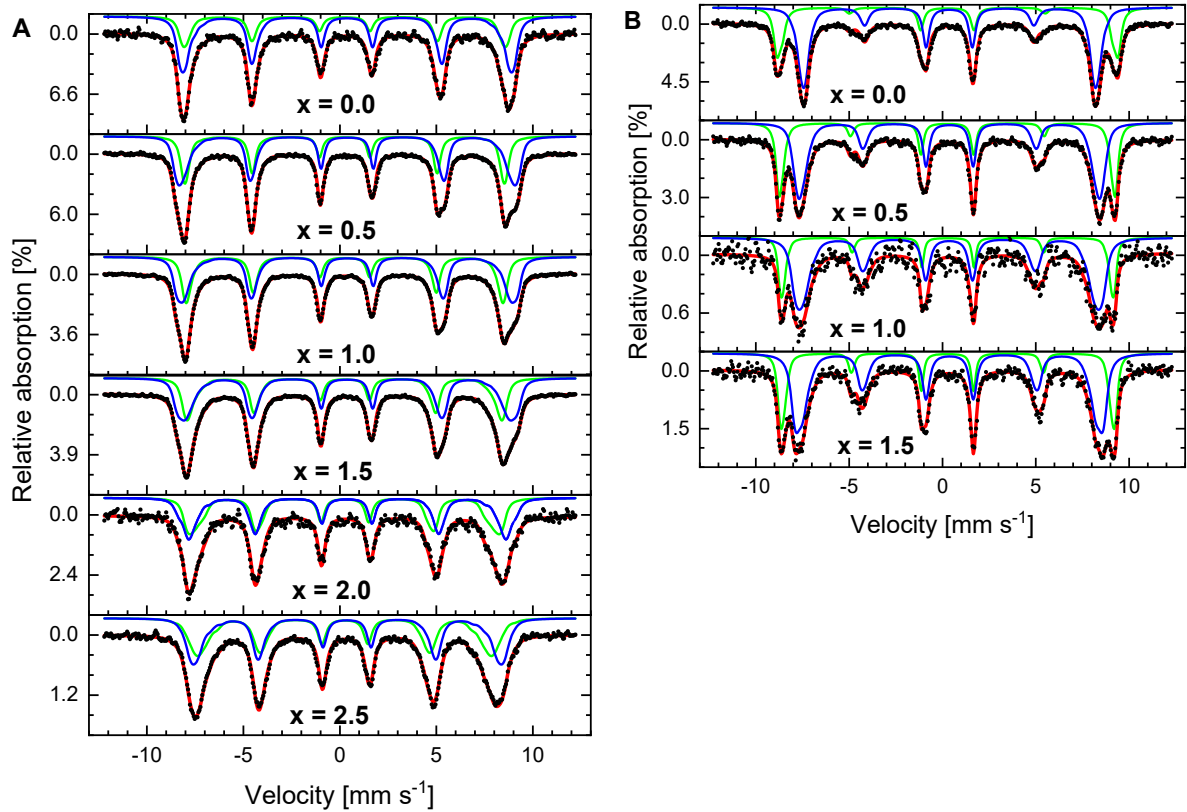

**Figure S7.** Mössbauer spectra of  $\text{Co}_x\text{Fe}_{3-x}\text{O}_4$  ( $x = 0.0, 0.5, 1, 1.5, 2, 2.5$ ) samples at 4.3 K (a) without and (b) with an external magnetic field of 5 T along  $\gamma$ -ray propagation direction, consisting of experimental data (black dots), overall theoretical fit (red),  $\text{Fe}^{3+}$  octahedral B-site (blue) and  $\text{Fe}^{3+}$  tetrahedral A-site subspectra (green).

Mössbauer spectra of spinels described by  $\text{Co}_x\text{Fe}_{3-x}\text{O}_4$  were recorded at 4.3 K with and without a magnetic field applied parallel to the  $\gamma$ -ray incidence direction. The spectra can be described with two sextet subspectra corresponding to  $\text{Fe}^{3+}$  on tetrahedrally (A-site) and octahedrally coordinated (B-site) lattice positions. Subspectra were reproduced via narrow hyperfine field distributions. Especially for intermediate Co fractions  $x \approx 1$ , the individual contributions are evident even without applying a magnetic field (fig. S7 a) to yield better subspectral resolution, as they result in pronounced fine structure of the spectral lines, due to their different average hyperfine magnetic field and isomer shift. For  $x < 2$  enhanced spectral resolution could be obtained in the in-field measurements (fig S7 b) due to the antiparallel alignment of the A- and B-site sublattice. For higher values of  $x$  towards antiferromagnetic  $\text{Co}_3\text{O}_4$ , the lack in magnetic orientation does not allow improved resolution as compared to the zero-field spectra, wherefore experiments at 5 T were limited to the aforementioned Co-fractions. The resulting increase in spin frustration upon rising  $x$  is evident by the rising relative intensity of lines 2 and 5 in the in-field spectra. In this context, a relative intensity ratio  $A_{23} \approx 0$  corresponds to perfect in-field alignment, while  $A_{23} \approx 2$  translates to randomly oriented magnetic moments even when exposed to the magnetic field [1], usually indicative of an antiferromagnetic state.

For a quantitative analysis of ion site occupation, we study the ratio of A- to B-site subspectral area, which represents the number of Fe ions on the respective lattice position, as the fraction of recoil-free processes for Fe on tetrahedral and octahedral sites at low temperatures can be considered to be very

similar. [43,44] Due to the high octahedral site preference energy of  $\text{Co}^{3+}$  as compared to  $\text{Co}^{2+}$  and  $\text{Fe}^{3+}$ ,  $\text{Co}^{3+}$  is often assumed to be located on the octahedral sites only.[2,3] Based on this consideration, inversion parameters as discussed in the main text can be estimated using the following equations:

For lower Co contents ( $1 \leq x \leq 2$ ,  $\alpha \leq 1$ ) the equation according to Murray *et al.* [4] applies:

$$\text{Fe}_{1-\alpha}^{3+}\text{Co}_{\alpha}^{2+}[\text{Fe}_{2-x+\alpha}^{3+}\text{Co}_{1-\alpha}^{2+}\text{Co}_{x-1}^{3+}]\text{O}_4^{2-}$$

For high Co contents ( $2 \leq x \leq 3$ ,  $\omega \leq x-3$ ) the equation according to Le Trong *et al.* [2] applies:

$$\text{Fe}_{3-x-\omega}^{3+}\text{Co}_{x-2+\omega}^{2+}[\text{Fe}_{\omega}^{3+}\text{Co}_{3-x-\omega}^{2+}\text{Co}_{x-1}^{3+}]\text{O}_4^{2-}$$

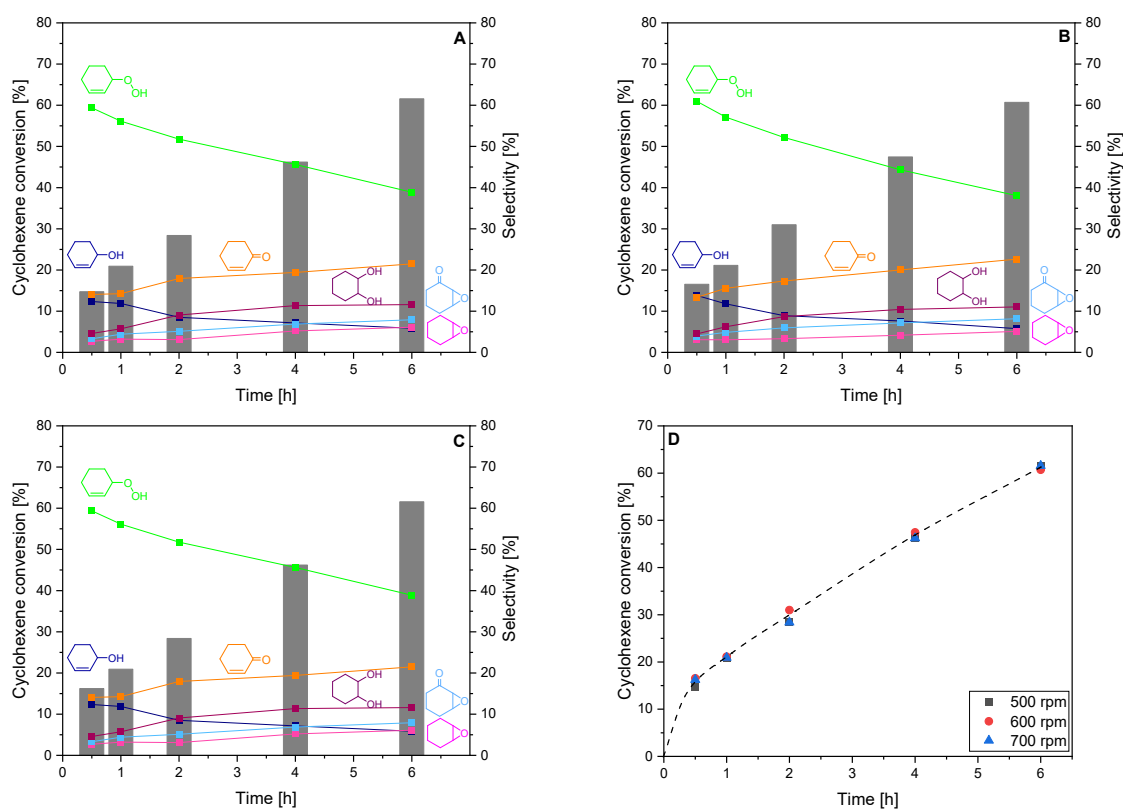

**Figure S8.** The effect of stirring speed on cyclohexene oxidation over  $\text{Co}_{2.5}\text{Fe}_{0.5}\text{O}_4$  stirring with (A) 500, (B) 600 and (C) 700 rpm and (D) the comparison of cyclohexene conversion over time at different stirring speeds. Reaction conditions: 20 mmol cyclohexene, 30 mL acetonitrile, 50 mg  $\text{Co}_{2.5}\text{Fe}_{0.5}\text{O}_4$ , 10 bar  $\text{O}_2$ , 80 °C, 6 h.

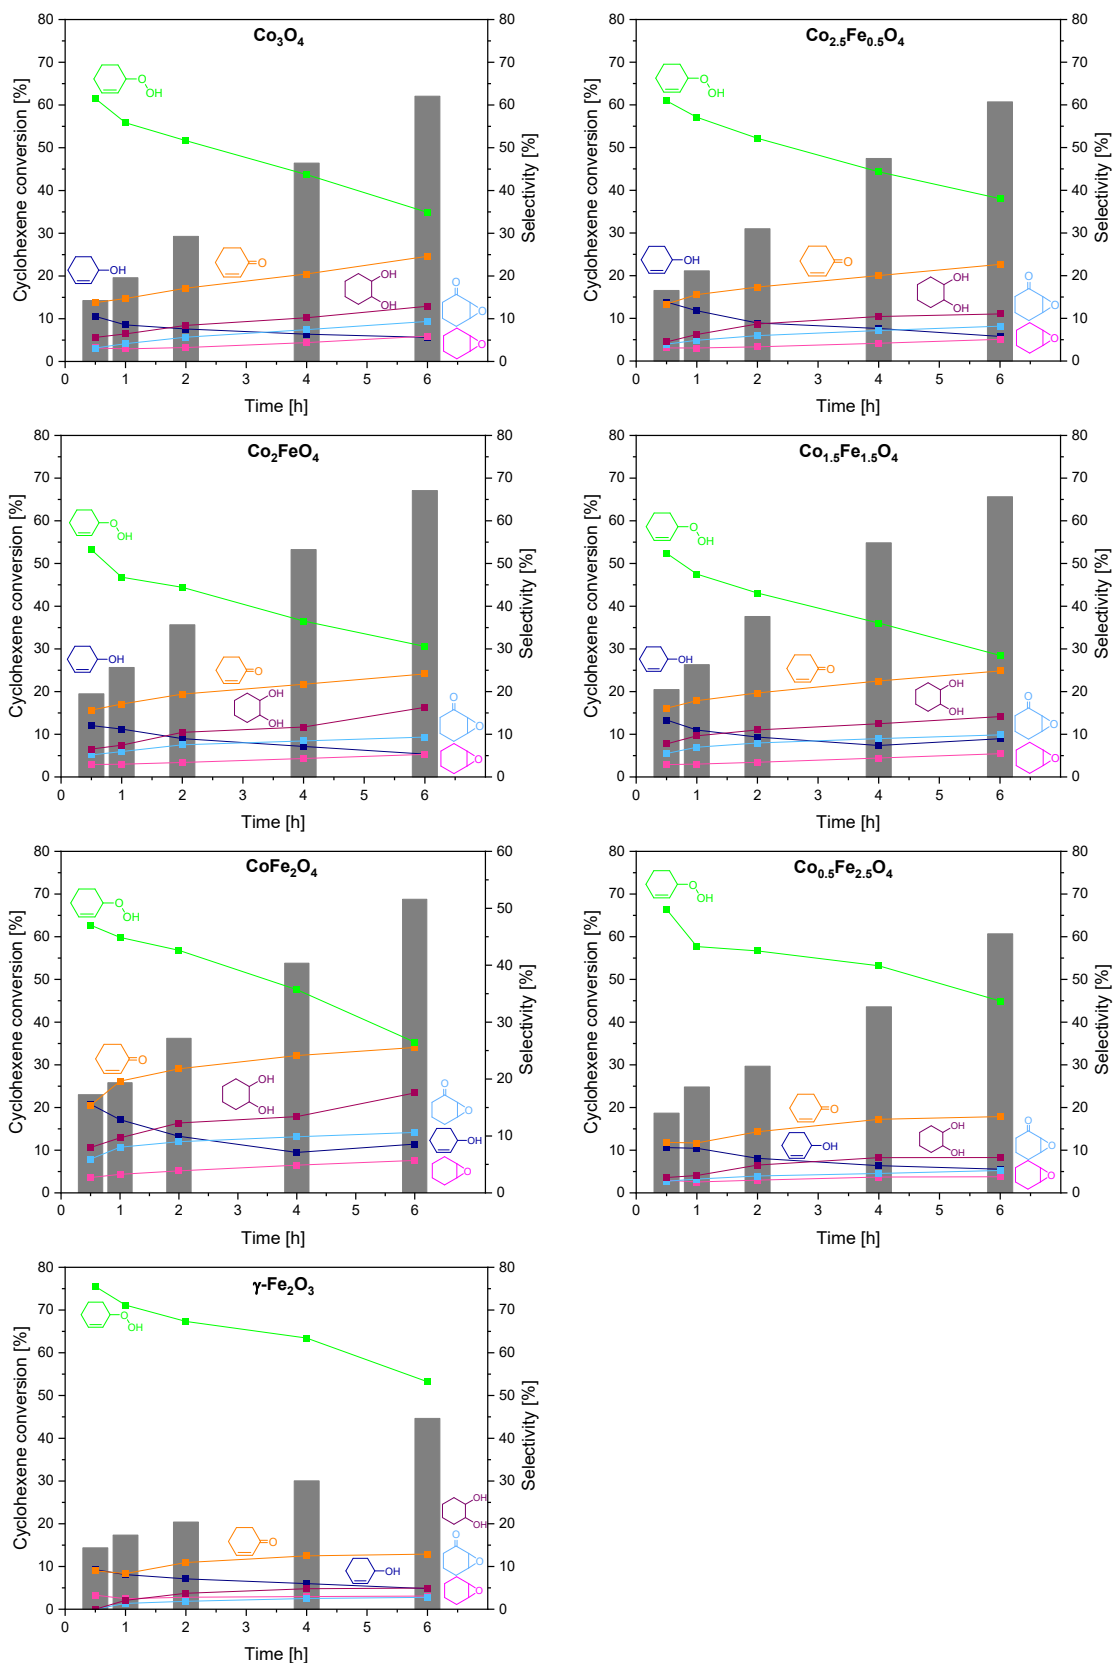

**Figure S9.** The influence of Fe doping on cyclohexene oxidation as a function of time over  $\text{Co}_x\text{Fe}_{3-x}\text{O}_4$  catalysts. Reaction conditions: 20 mmol cyclohexene, 30 mL acetonitrile, 50 mg catalyst, 80 °C, 10 bar  $\text{O}_2$ , 600 rpm, 6 h.

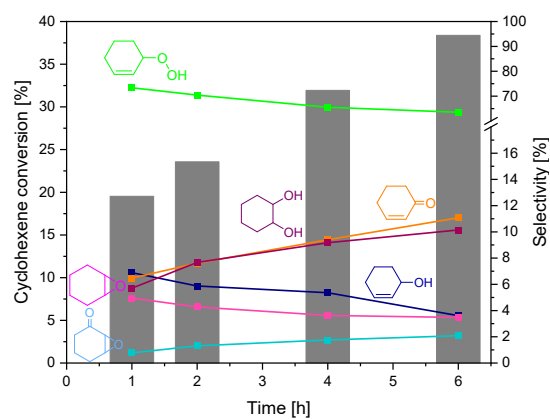

**Figure S10.** Cyclohexene conversion and product selectivity as a function of time in the absence of catalyst. Reaction conditions: 20 mmol cyclohexene, 30 mL acetonitrile, 80 °C, 10 bar O<sub>2</sub>, 600 rpm, 6 h.

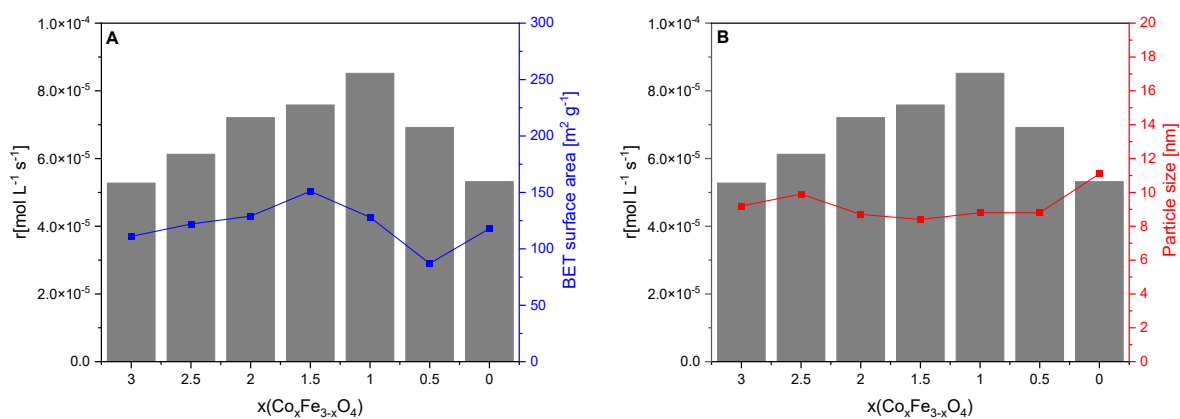

**Figure S11.** Effect of (A) specific surface area and (B) particle size on cyclohexene oxidation over Co<sub>x</sub>Fe<sub>3-x</sub>O<sub>4</sub> catalysts. Reaction conditions: 20 mmol cyclohexene, 30 mL acetonitrile, 50 mg catalyst, 80 °C, 10 bar O<sub>2</sub>, 600 rpm, 0.5 h.



**Table S2.** Comparison of the catalytic activity of Co-based catalysts in literature.

| Reference                      | Catalyst                                                  | Reaction conditions                                                                    | X [%] | S(Ketone) [%] |
|--------------------------------|-----------------------------------------------------------|----------------------------------------------------------------------------------------|-------|---------------|
| Present study                  | Spray-flame-synthesized $\text{CoFe}_2\text{O}_4$         | 0.67 mol L <sup>-1</sup><br>50 mg catalyst<br>80 °C<br>10 bar O <sub>2</sub><br>6 h    | 69    | 26            |
| Büker et al. <sup>[5]</sup>    | Spray-flame-synthesized $\text{LaCoO}_3$                  | 0.67 mol L <sup>-1</sup><br>60 mg catalyst<br>80 °C<br>10 bar O <sub>2</sub><br>6 h    | 69    | 47            |
| Denekamp et al. <sup>[6]</sup> | Co/N:C                                                    | 1.65 mol L <sup>-1</sup><br>10 mg catalyst<br>70 °C<br>10 bar O <sub>2</sub><br>16 h   | 80    | 38            |
| Fu et al. <sup>[7]</sup>       | Co-MOF                                                    | 5 mL cyclohexene (solvent-free)<br>50 mg catalyst<br>80 °C<br>Ambient pressure<br>10 h | 8     | 4             |
| Silva et al. <sup>[8]</sup>    | Deposited CoO                                             | 1.33 mol L <sup>-1</sup><br>0.004 mmol Co<br>75 °C<br>3 bar O <sub>2</sub><br>6 h      | 17    | 94            |
| Silva et al. <sup>[8]</sup>    | Deposited $\text{SiO}_2\text{-Co}_3\text{O}_4$            | 1.33 mol L <sup>-1</sup><br>0.004 mmol Co<br>75 °C<br>3 bar O <sub>2</sub><br>6 h      | 15    | 66            |
| Sun et al. <sup>[9]</sup>      | Co/Ni-MOF                                                 | 2 mL cyclohexene<br>20 mg catalyst<br>80 °C<br>Ambient pressure<br>20 h                | 55    | 30            |
| Zhang et al. <sup>[10]</sup>   | Co-MOF                                                    | 18 mmol cyclohexene<br>0.05 mmol Co in MOF<br>70 °C<br>Ambient pressure<br>24 h        | 38    | 20            |
| Li et al. <sup>[11]</sup>      | Co <sup>2+</sup> supported on etched halloysite nanotubes | 0.8 mL cyclohexene<br>40 mg catalyst<br>75 °C<br>Ambient pressure<br>18 h              | 10    | 46            |

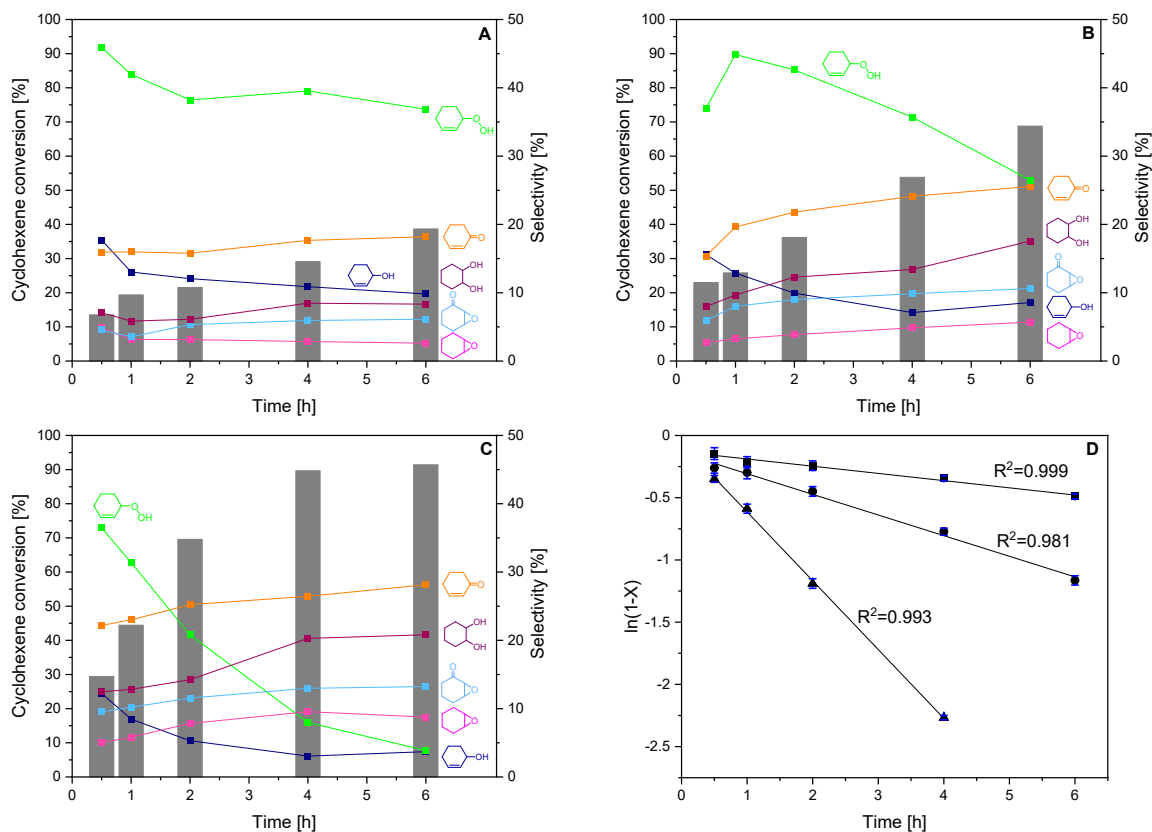

**Figure S12.** Cyclohexene oxidation over  $\text{CoFe}_2\text{O}_4$  at (A) 60 °C, (B) 80 °C and (C) 100 °C and the linearized plot for Arrhenius analysis (D). Reaction conditions: 20 mmol cyclohexene, 30 mL acetonitrile, 50 mg catalyst, 10 bar  $\text{O}_2$ , 600 rpm, 6 h.

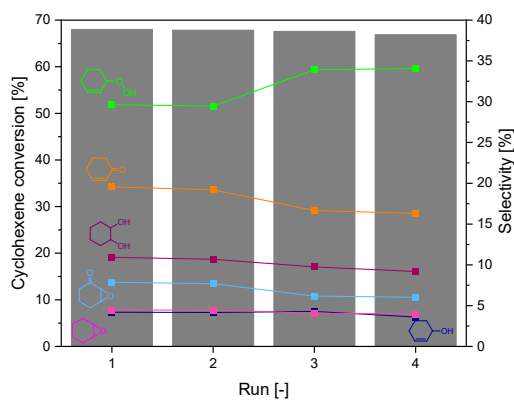

**Figure S13.** Reusability test of cyclohexene oxidation over  $\text{CoFe}_2\text{O}_4$ . Reaction conditions: 20 mmol cyclohexene, 30 mL acetonitrile, 50 mg catalyst, 80 °C, 10 bar  $\text{O}_2$ , 600 rpm, 6 h. After each run, the catalyst was separated by centrifugation and dried overnight at 60 °C.

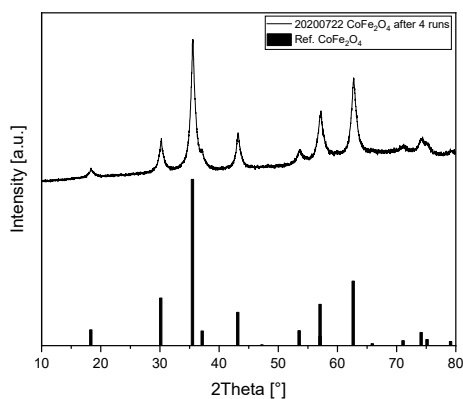

**Figure S14.** XRD pattern of  $\text{CoFe}_2\text{O}_4$  after the reusability test with four consecutive reaction runs.

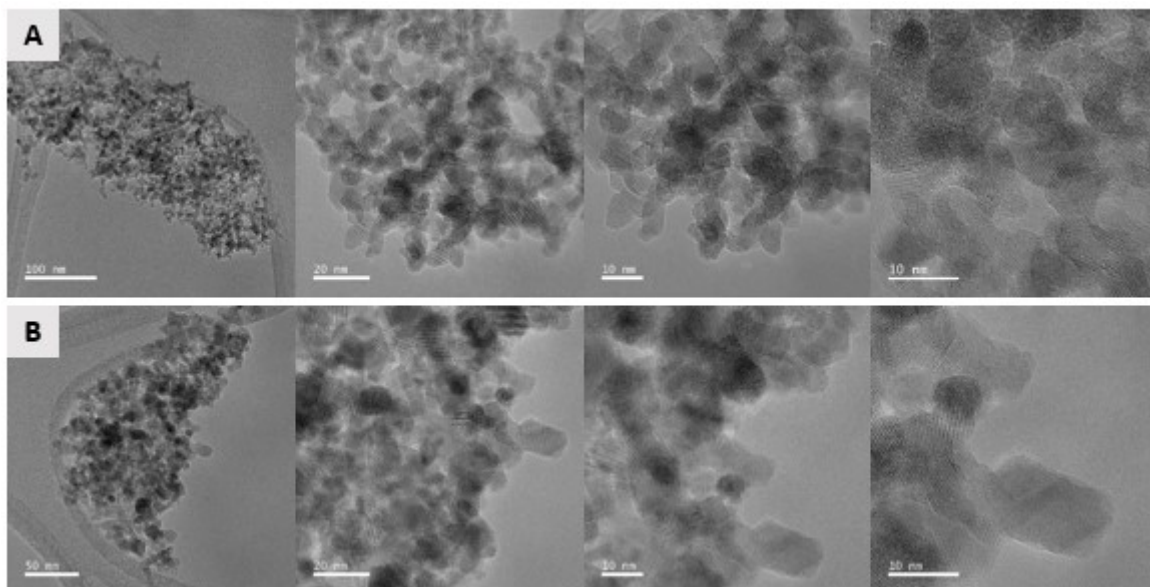

**Figure S15.** TEM images of  $\text{CoFe}_2\text{O}_4$  before (A) and after (B) the reusability test with four consecutive reaction runs.

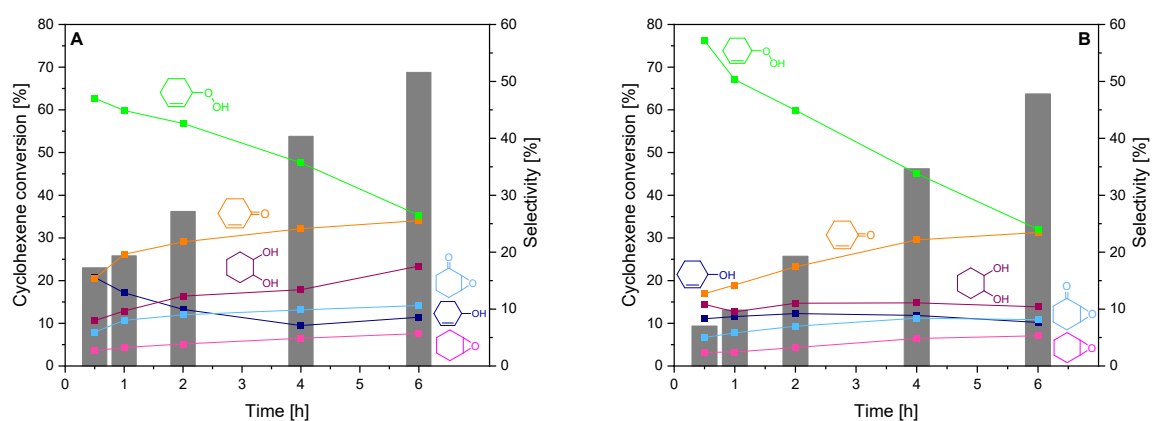

**Figure S16.** The influence of  $\text{H}_2\text{O}$  on cyclohexene oxidation; Cyclohexene conversion and product selectivity over  $\text{CoFe}_2\text{O}_4$  in the absence (A) and in the presence (B) of  $\text{H}_2\text{O}$ . Reaction conditions: 20 mmol cyclohexene, 30 mL acetonitrile, 50 mg catalyst, 80 °C, 600 rpm, 6 h.

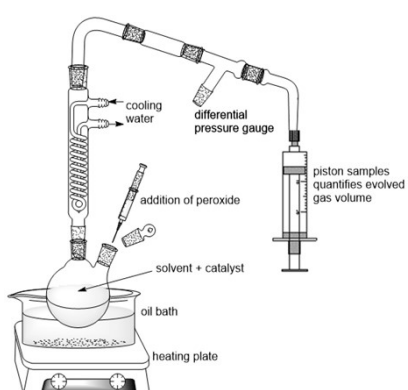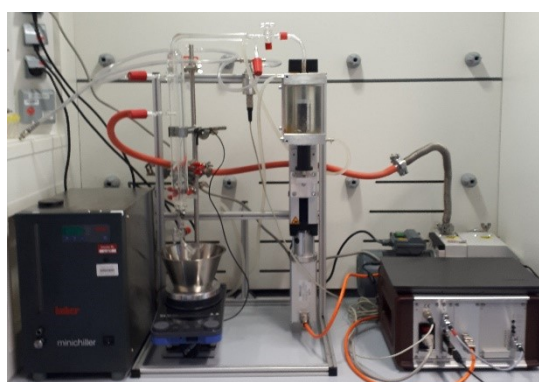

**Figure S17.** Scheme and picture of the peroxide decomposition set-up used for the simulation of hydroperoxide decomposition during cyclohexene oxidation using  $\text{H}_2\text{O}_2$  and *tert*-butyl hydroperoxide.

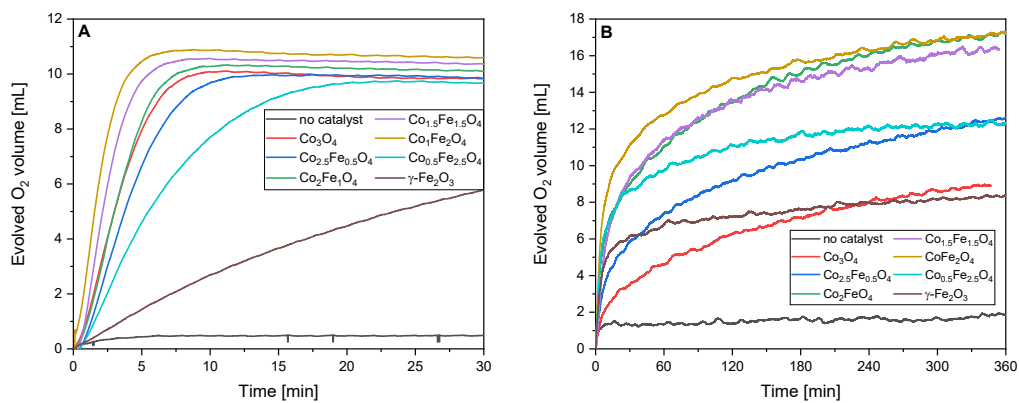

**Figure S18.** H<sub>2</sub>O<sub>2</sub> (A) and TBHP (B) decomposition over Co<sub>x</sub>Fe<sub>3-x</sub>O<sub>4</sub> catalysts. The reaction progress was monitored by recording the evolved O<sub>2</sub> volume over time.

**Table S3.** Reaction rate constants on H<sub>2</sub>O<sub>2</sub> decomposition (0.04 M, 30 °C) over Co<sub>x</sub>Fe<sub>3-x</sub>O<sub>4</sub> without normalization and normalized to the catalyst mass and specific surface area.

| x     | k<br>[s <sup>-1</sup> ] | k <sub>m</sub><br>[s <sup>-1</sup> g <sup>-1</sup> ] | k <sub>s</sub><br>[s <sup>-1</sup> m <sup>-2</sup> ] |
|-------|-------------------------|------------------------------------------------------|------------------------------------------------------|
| 3     | 0.416                   | 41.6                                                 | 0.352                                                |
| 2.5   | 0.302                   | 30.2                                                 | 0.347                                                |
| 2     | 0.530                   | 53.0                                                 | 0.414                                                |
| 1.5   | 0.666                   | 66.5                                                 | 0.441                                                |
| 1     | 0.679                   | 67.9                                                 | 0.527                                                |
| 0.5   | 0.144                   | 14.4                                                 | 0.118                                                |
| 0     | 0.029                   | 2.9                                                  | 0.026                                                |
| blank | 0.00118                 | -                                                    | -                                                    |

**Table S4.** Reaction rate constants on H<sub>2</sub>O<sub>2</sub> decomposition over CoFe<sub>2</sub>O<sub>4</sub> from literature.

| Reference                        | c(H <sub>2</sub> O <sub>2</sub> )    | T [° C] | Solvent          | k                                                      |
|----------------------------------|--------------------------------------|---------|------------------|--------------------------------------------------------|
| Cota et al. <sup>[46]</sup>      | 0.09 M H <sub>2</sub> O <sub>2</sub> | 22      | 6.9 M KOH        | k <sub>s</sub> = 0.071 s <sup>-1</sup> m <sup>-2</sup> |
| Goldstein et al. <sup>[47]</sup> | 1 M H <sub>2</sub> O <sub>2</sub>    | 25      | 5 M KOH          | k <sub>s</sub> = 0.120 s <sup>-1</sup> m <sup>-2</sup> |
| Mimani et al. <sup>[49]</sup>    | 0.1 M H <sub>2</sub> O <sub>2</sub>  | 30      | H <sub>2</sub> O | k <sub>s</sub> = 0.232 s <sup>-1</sup> m <sup>-2</sup> |
| Onuchukwu et al. <sup>[48]</sup> | 0.5 M H <sub>2</sub> O <sub>2</sub>  | 27      | 5 M KOH          | k <sub>m</sub> = 14 s <sup>-1</sup> g <sup>-1</sup>    |
| Preeti et al. <sup>[50]</sup>    | 0.8 M H <sub>2</sub> O <sub>2</sub>  | 30      | H <sub>2</sub> O | k <sub>m</sub> = 0.037 s <sup>-1</sup> g <sup>-1</sup> |
| Tatarchuk et al. <sup>[51]</sup> | 0.02 M H <sub>2</sub> O <sub>2</sub> | 25      | H <sub>2</sub> O | k <sub>s</sub> = 0.04 s <sup>-1</sup> m <sup>2</sup>   |

**Table S5.** Theoretical spinel type and cationic distribution of the Co<sub>x</sub>Fe<sub>3-x</sub>O<sub>4</sub> spinel series.<sup>[48],[49],[52]-[54]</sup>

| x                                     | Theoretical spinel type | Theoretical cation valency distribution*                                                                                                                              |
|---------------------------------------|-------------------------|-----------------------------------------------------------------------------------------------------------------------------------------------------------------------|
| 3 (Co <sub>3</sub> O <sub>4</sub> )   | Normal                  | (Co <sup>2+</sup> ) [Co <sup>3+</sup> <sub>2</sub> ]                                                                                                                  |
| 2.5                                   |                         | (Co <sup>2+</sup> ) [Co <sup>3+</sup> <sub>1.5</sub> Fe <sup>3+</sup> <sub>0.5</sub> ]                                                                                |
| 2                                     |                         | (Co <sup>2+</sup> ) [Co <sup>3+</sup> Fe <sup>3+</sup> ]                                                                                                              |
| 1.5                                   | Inverse                 | (Co <sup>2+</sup> <sub>0.5</sub> Fe <sup>2+</sup> <sub>0.5</sub> ) [Co <sup>2+</sup> <sub>0.5</sub> Co <sup>3+</sup> <sub>0.5</sub> Fe <sup>3+</sup> <sub>0.5</sub> ] |
| 1 (CoFe <sub>2</sub> O <sub>4</sub> ) |                         | (Fe <sup>3+</sup> ) [Co <sup>2+</sup> Fe <sup>3+</sup> ]                                                                                                              |
| 0.5                                   |                         | (Fe <sup>3+</sup> ) [Co <sup>2+</sup> <sub>0.5</sub> Fe <sup>2+</sup> <sub>0.5</sub> Fe <sup>3+</sup> ]                                                               |
| 0 (Fe <sub>3</sub> O <sub>4</sub> )   |                         | (Fe <sup>3+</sup> ) [Fe <sup>2+</sup> Fe <sup>3+</sup> ]                                                                                                              |

\*() and [] denote tetrahedral and octahedral coordinations sites, respectively

**Scheme S1.** Haber-Weiss reaction mechanism for H<sub>2</sub>O<sub>2</sub> decomposition over Fe<sup>2+</sup>.<sup>[55],[56]</sup>

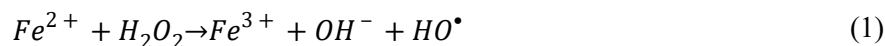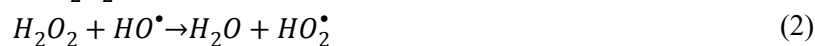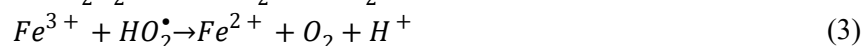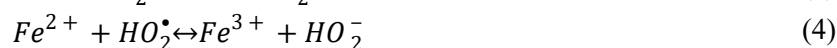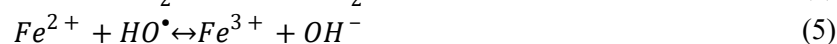

## References

- [1] J. Landers, S. Salamon, S. Webers, H. Wende, Microscopic understanding of particle-matrix interaction in magnetic hybrid materials by element-specific spectroscopy, *Phys. Sci. Rev.* 2021, <https://doi.org/10.1515/psr-2019-0116>
- [2] H. Le Trong, L. Presmanes, E. de Grave, A. Barnabé, C. Bonningue, P. Tailhades, Mössbauer characterisations and magnetic properties of iron cobaltites  $\text{Co}_x\text{Fe}_{3-x}\text{O}_4$  ( $1 \leq x \leq 2.46$ ) before and after spinodal decomposition, *J. Magn. Magn. Mater.* 2013, **334**, 66–73.
- [3] D.S. McClure, The distribution of transition metal cations in spinels, *J. Phys. Chem. Solids* 1957, **3**, 311–317.
- [4] P.J. Murray, J.W. Linnett, Mössbauer studies in the spinel system  $\text{Co}_x\text{Fe}_{3-x}\text{O}_4$ , *J. Phys. Chem. Solids* 1976, **37**, 619–624.
- [5] J. Büker, B. Alkan, Q. Fu, W. Xia, J. Schulwitz, D. Waffel, T. Falk, C. Schulz, H. Wiggers and M. Muhler, Selective Cyclohexene Oxidation with  $\text{O}_2$ ,  $\text{H}_2\text{O}_2$  and Tert-Butyl Hydroperoxide over Spray-Flame Synthesized  $\text{LaCo}_{1-x}\text{Fe}_x\text{O}_3$  Nanoparticles, *Catal. Sci. Technol.*, 2020, **10**, 5196–5206.
- [6] I. M. Denekamp, M. Antens, T. K. Slot, G. Rothenberg, Selective Catalytic Oxidation of Cyclohexene with Molecular Oxygen: Radical Versus Nonradical Pathways, *ChemCatChem* 2018, **10**, 1035-1041.
- [7] Y. Fu, D. Sun, M. Qin, R. Huang, Z. Li, Cu(II)-and Co(II)-containing metal–organic frameworks (MOFs) as catalysts for cyclohexene oxidation with oxygen under solvent-free conditions, *RSC Adv.*, 2012, **2**, 3309-3314.
- [8] F. P. Silva, M. J. Jacinto, R. Landers, L. M. Rossi, Selective Allylic oxidation of Cyclohexene by a Magnetically Recoverable Cobalt Oxide Catalyst, *Catal Lett* 2011, **141**, 432-437.
- [9] D. Sun, F. Sun, X. Deng, Z. Li, Mixed-Metal Strategy on Metal–Organic Frameworks (MOFs) for Functionalities Expansion: Co Substitution Induces Aerobic Oxidation of Cyclohexene over Inactive Ni-MOF-74, *Inorg. Chem.* 2015, **54**, 8639–8643.
- [10] T. Zhang, Y.-Q. Hu, T. Han, Y.Q. Zhai, Y.-Z. Zheng, Redox-Active Cobalt(II/III) Metal–Organic Framework for Selective Oxidation of Cyclohexene, *ACS Appl. Mater. Interfaces* 2018, **10**, 18, 15786-15792.
- [11] C. Li, Y. Zhao, T. Zhu, Y. Li, J. Ruan, G. Li, Effective solvent-free oxidation of cyclohexene to allylic products with oxygen by mesoporous etched halloysite nanotube supported  $\text{Co}^{2+}$ , *RSC Adv.* 2018, **8**, 14870.
